# Supplementary material for: Aging-dependent mitochondrial dysfunction mediated by ceramide signaling inhibits antitumor T cell response
Source: PubMed Central journal article supplement — Cell Rep. Author manuscript; Available in PMC 2021 May 17. (PMC8127241; doi:10.1016/j.celrep.2021.109076), 2021-05-04

**Cell Reports, Volume 35**

**Supplemental information**

**Aging-dependent mitochondrial dysfunction**

**mediated by ceramide signaling**

**inhibits antitumor T cell response**

**Silvia Vaena, Paramita Chakraborty, Han Gyul Lee, Alhaji H. Janneh, Mohamed Faisal Kassir, Gyda Beeson, Zachariah Hedley, Ahmet Yalcinkaya, M. Hanief Sofi, Hong Li, Monica L. Husby, Robert V. Stahelin, Xue-Zhong Yu, Shikhar Mehrotra, and Besim Ogretmen**

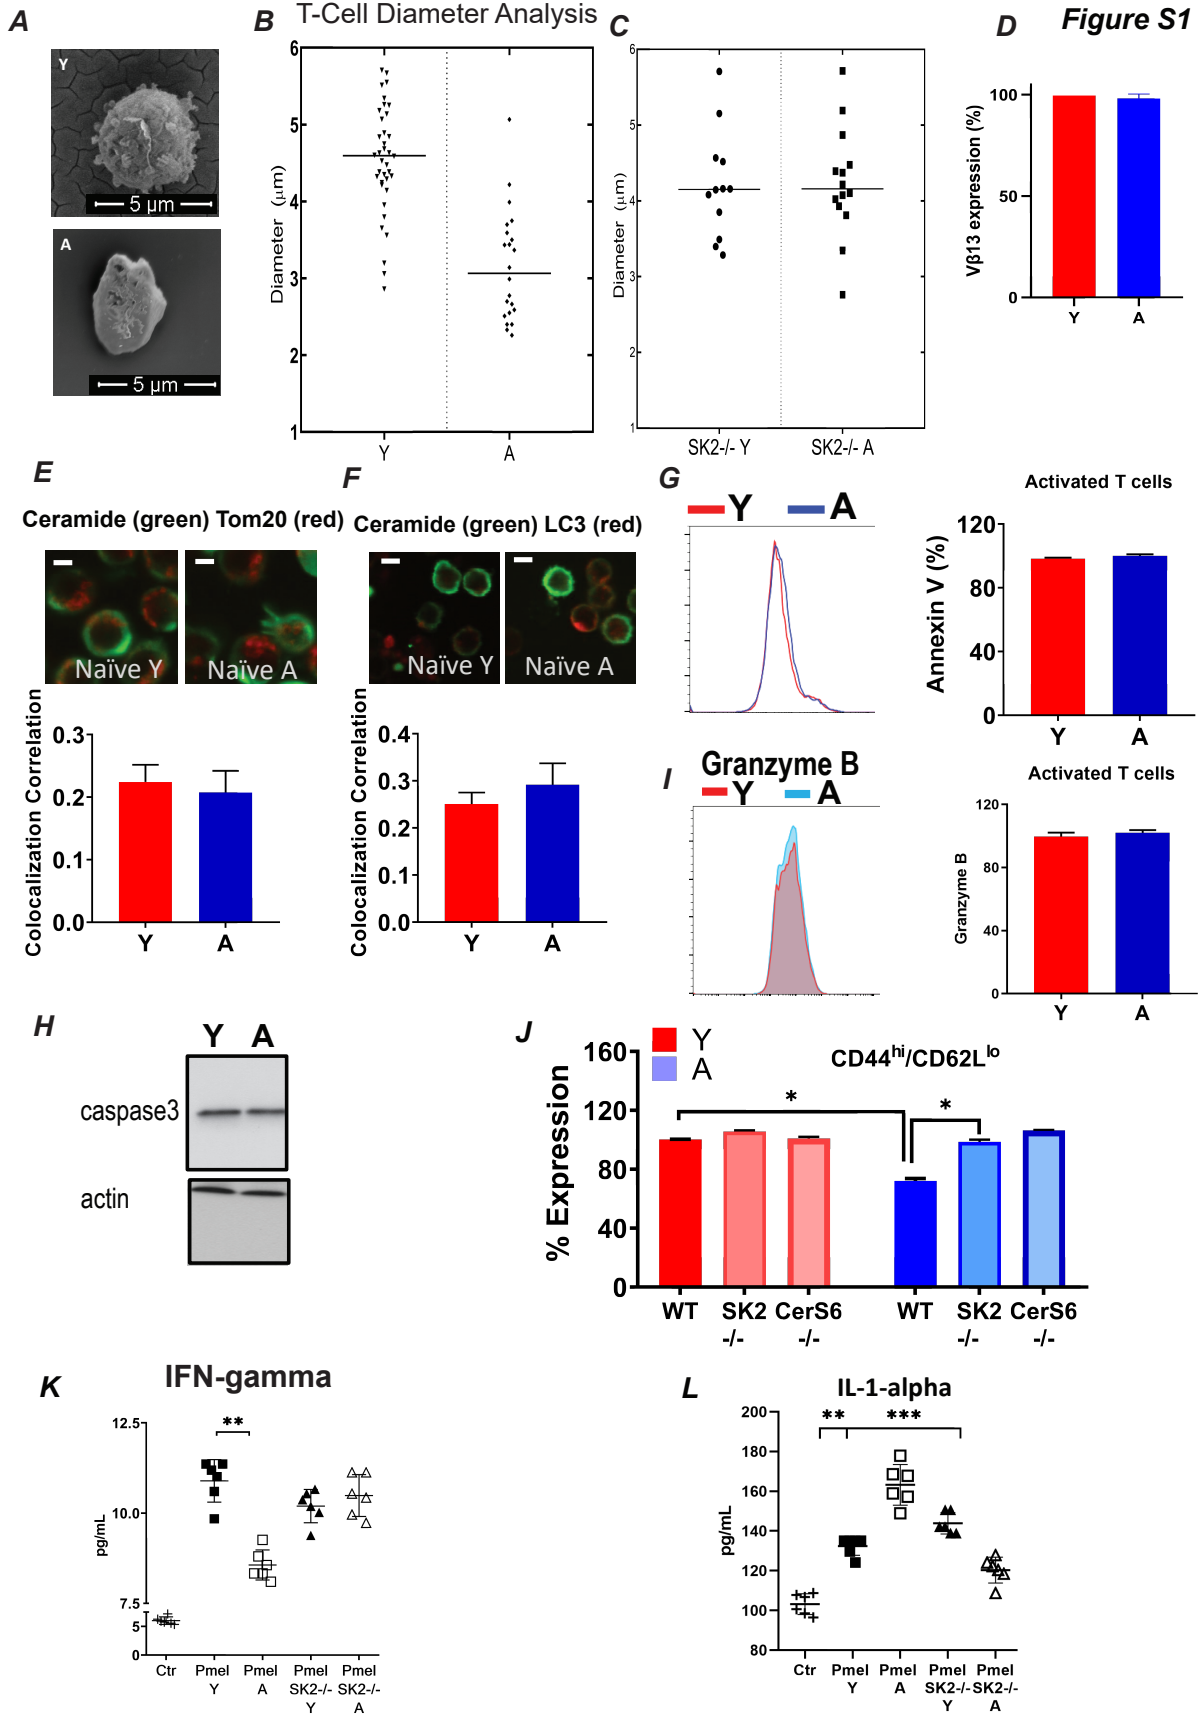

**Figure S1 (Related to Figure 1). Aging T cells exhibit morphological and functional alterations.** **A-C.** Scanning electron microscopy (SEM) micrographs (A) of ex vivo activated T cells isolated from Y and A WT or SphK2<sup>-/-</sup> (SK2) mice were acquired, and cell diameters (B-C) were quantified (n=15-30). **D.** Flow cytometry Vβ13 T-cell receptor analysis on CD8<sup>+</sup> T-cells from Y and A Pmel mice. **E-F.** Confocal microscopy for Y and A naïve T cells dual labeled with TOM20 (red, mitochondrial marker), and ceramide (green) (E), as well as ceramide (green) and LC3 (red) fluorescent antibodies (F). Scale bars, 1 μm. Images represent at least three independent experiments. The bottom panel shows the quantification of colocalization extracted from the coefficient of colocalization (*Rc*) **G.** Flow cytometry Annexin V analyses of activated T cells obtained from Y and A mice. **H.** Western blotting measuring pro-caspase 3 in activated T cells obtained from Y and A mice. **I.** Flow cytometry for the detection of granzyme B in activated T cells obtained from Y and A mice. **J.** Measurement of CD44 and CD62L in activated T cells obtained from Y and A WT, SphK2<sup>-/-</sup> (SK2) and CerS6<sup>-/-</sup> mice using flow cytometry. **K-L.** Levels of IFN-gamma and IL-1alpha were measured by ELISA in activated T cells obtained from Y and A WT or SphK2<sup>-/-</sup> (SK2) mice. These data represent three independent experiments (n=3). \**p*< 0.05, \*\**p*< 0.005 or \*\*\**p*< 0.0005 as determined by Student's *t*-test.

Figure S2

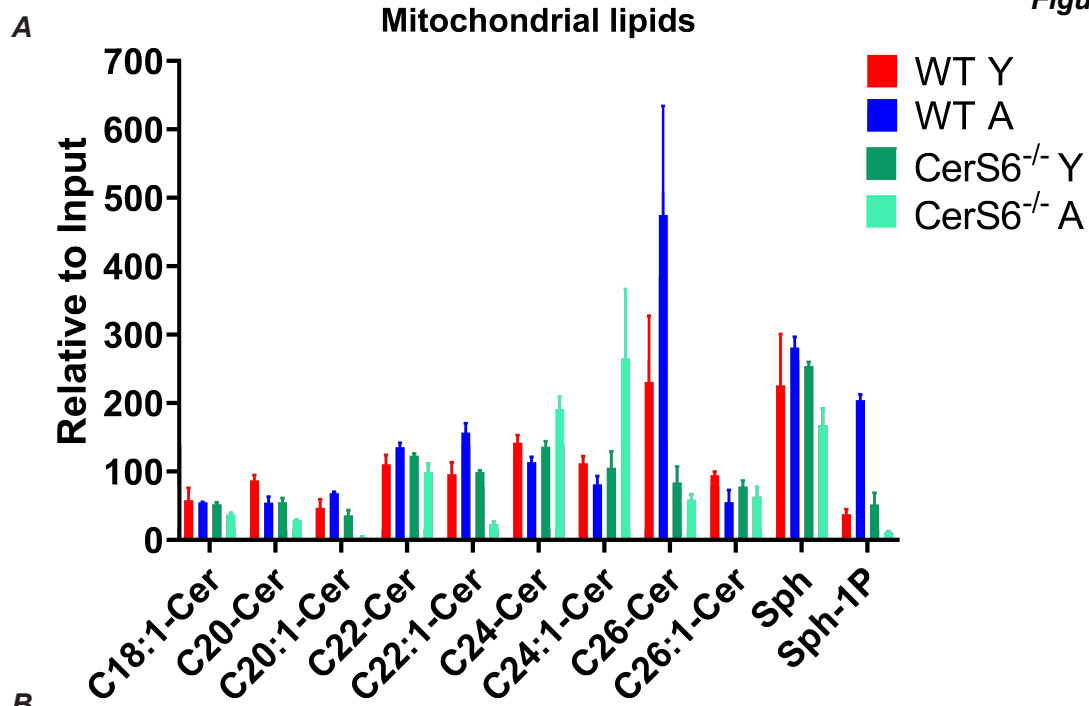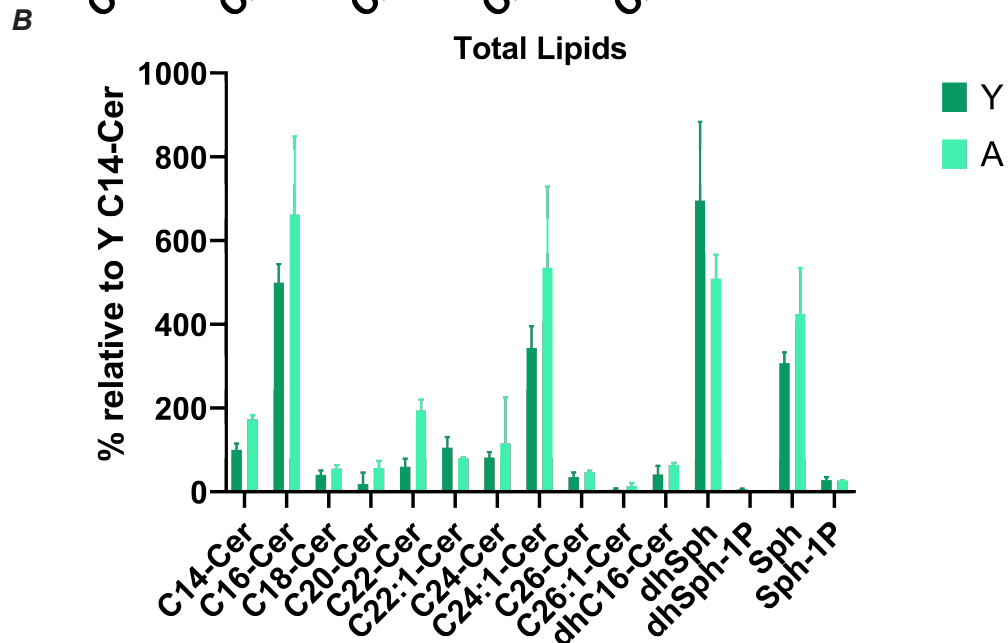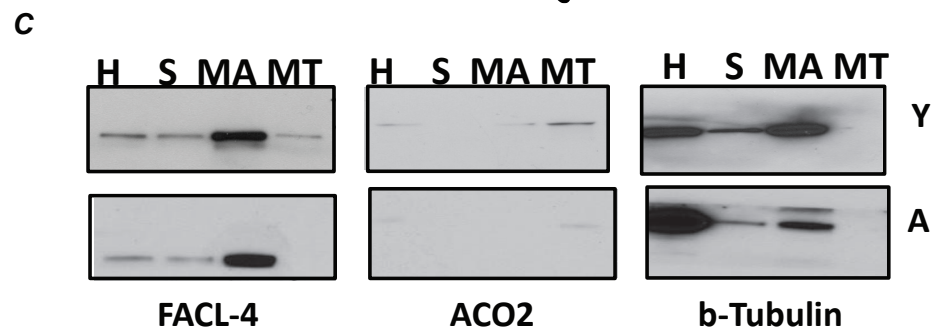

**Figure S2 (Related to Figure 2). Mitochondrial accumulation of sphingolipids in young and aging T cells. A-B.** HPLC-MS-MS and lipidomics-based measurements of sphingolipids in mitochondria (MITO) enriched gradient fractions (A) or total cell lysates (B) from T cells obtained from Y and A WT or CerS6<sup>-/-</sup> mice. Data are means  $\pm$  SD from at least three experiments. **C.** Western blots showing enrichment of resident proteins for fractions (H, total homogenates, S, supernatant, MA, MAMs, MITO, mitochondrial fractions) obtained during the purification procedures in T cells shown in A for FAACL4, ACO2 and beta-tubulin. These data represent three independent experiments (n=3).

**Figure S3**

**A**

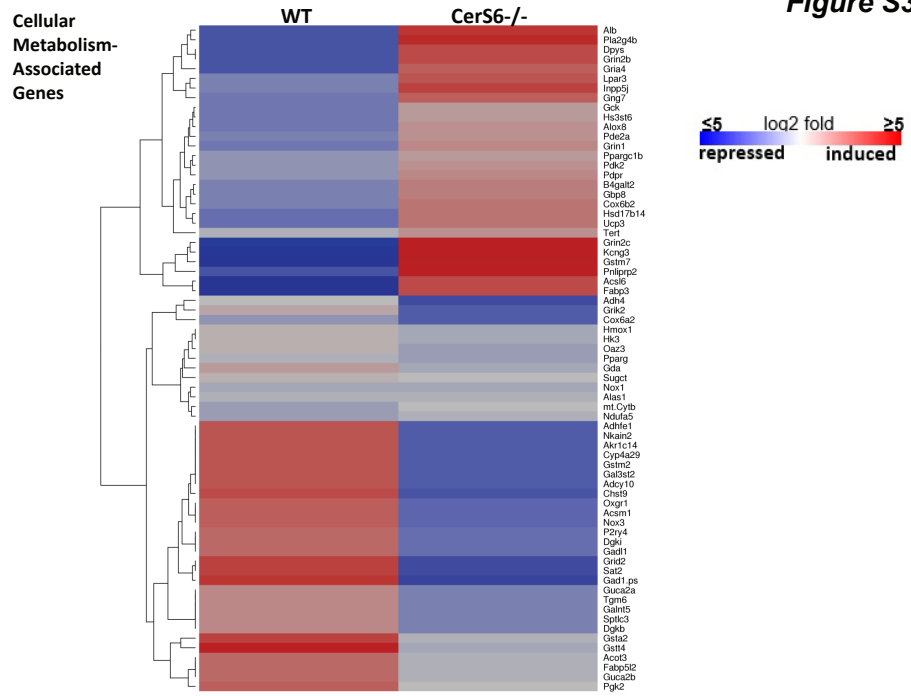

**B**

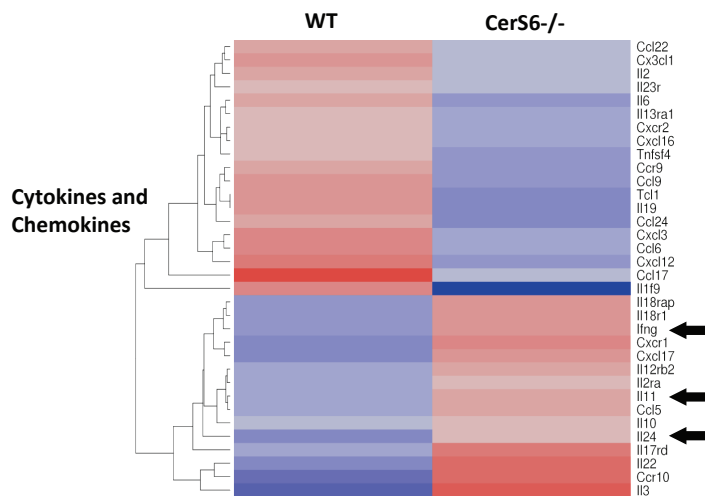

**C**

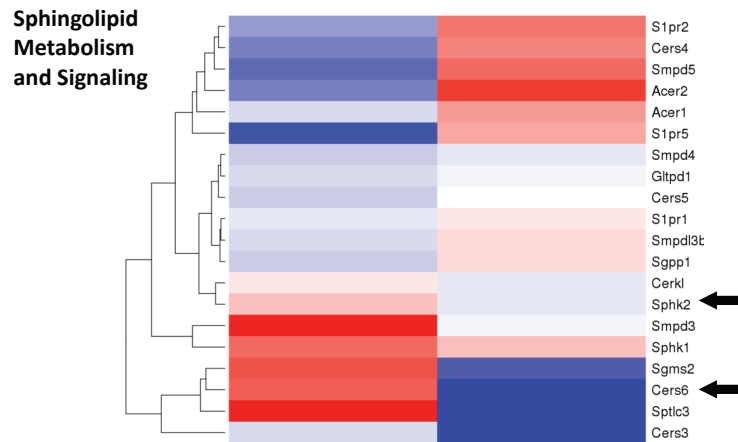

**Figure S3 (Related to Figures 2 and 3). RNAseq analyses of activated T cells obtained from Y and A WT and CerS6<sup>-/-</sup> mice. A-C.** Genes that are involved in the regulation of cellular metabolism (A), cytokines/ chemokines (B) or sphingolipid metabolism and signaling (C) were analyzed. The gene expression (upregulated or downregulated) levels were depicted into heatmaps in T cells from A compared to Y WT or CerS6<sup>-/-</sup> mice.

Figure S4

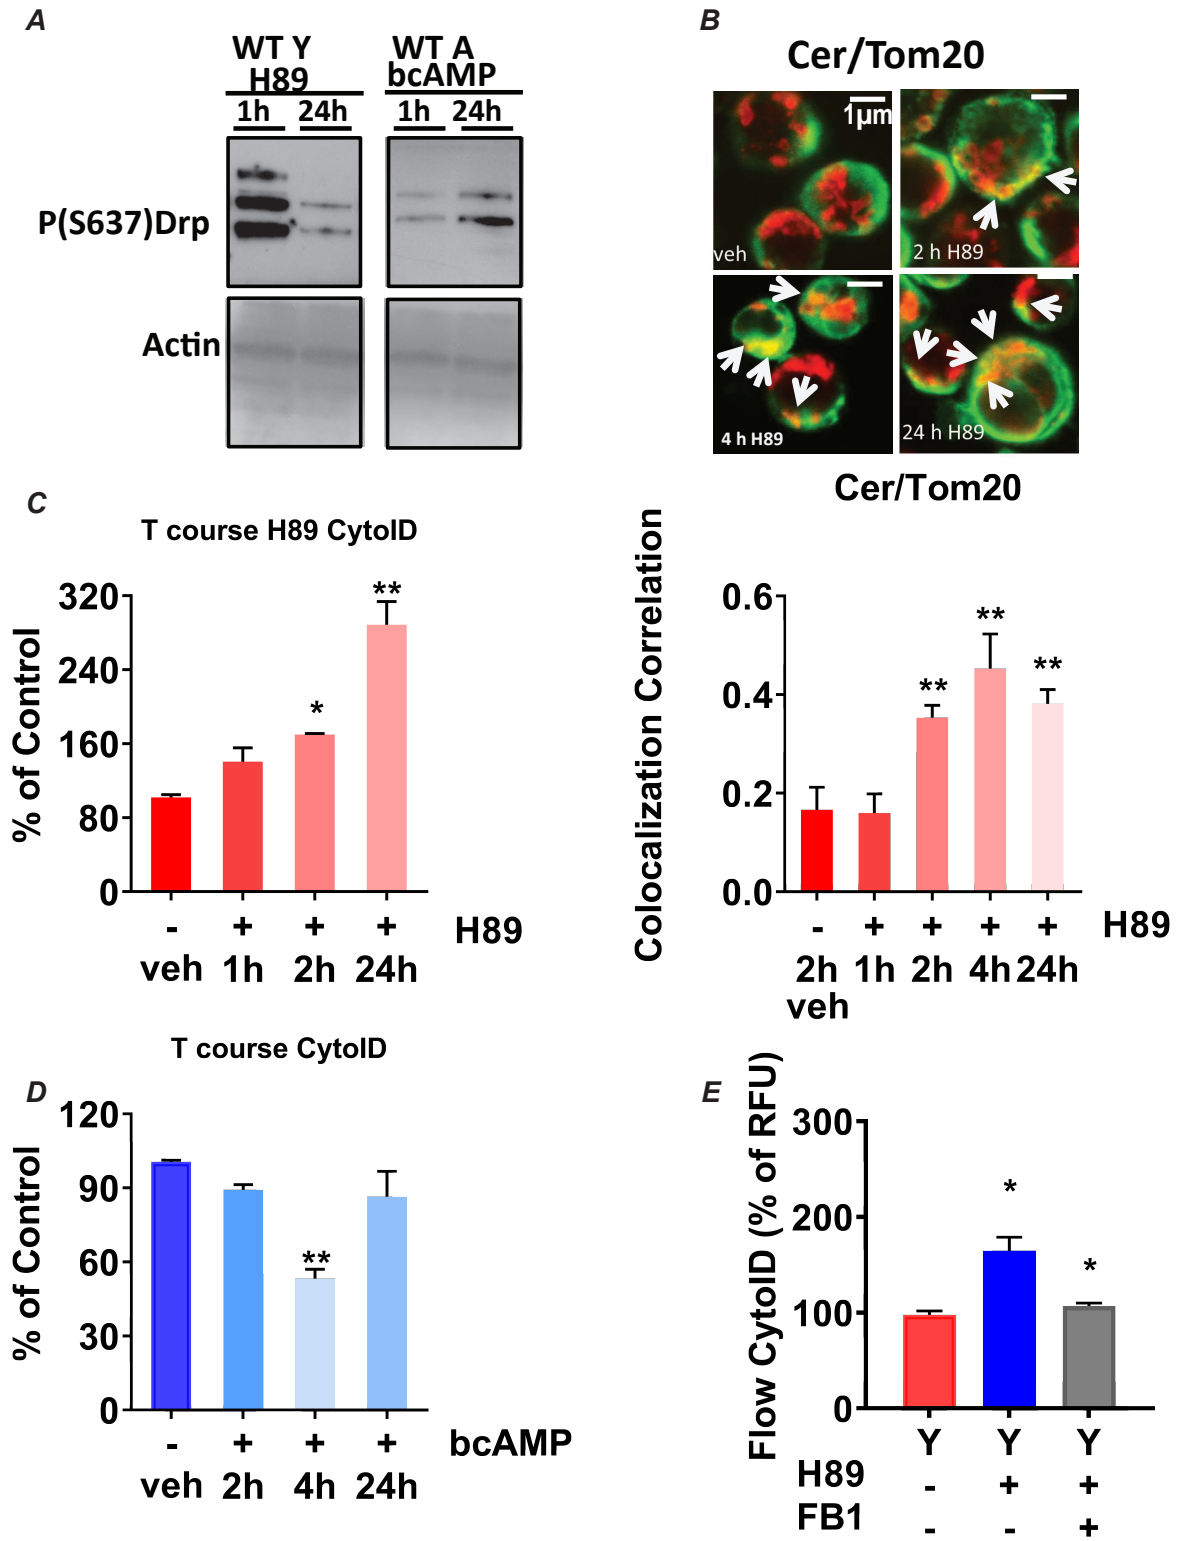



**Figure S4 (Related to Figures 4 and 5). Modulation of PKA activity affects mitophagy in Y and A T cells.** **A.** Western blot to detect P-(S637)-Drp1 in activated T cells isolated from Y with/without H89 (PKA inhibitor) and A with/without PKA activator (bcAMP). Blots represent at least three independent experiments. **B.** Co-localization of ceramide (Cer) and TOM20 was measured in activated T cells isolated from Y mice in the absence/presence of H89 at 1, 2, 4, and 24 h. The lower panel shows the quantification of co-localization extracted from the coefficient of colocalization ( $Rc$ ). Arrows indicate merged, yellow. Scale bars, 1  $\mu$ m. Quantification of colocalization extracted from the coefficient of colocalization ( $Rc$ ) using the Fiji software. **C-D.** LC3 activation was measured using cyto-ID by flow cytometry in activated T cells isolated from Y mice (C) in the absence/presence of H89 or A mice in the absence/presence of bcAMP at 0, 1, 2 and 24 h or 0, 2, 4 or 24 h (D). **E.** Effects of FB1 in the absence/presence of H89 on LC3 activation were measured by flow cytometry (cyto-ID) in activated T cells isolated from Y WT mice. These data represent three independent experiments (n=3). \* $p$ < 0.05 and \*\* $p$ < 0.005 as determined by Student's *t*-test

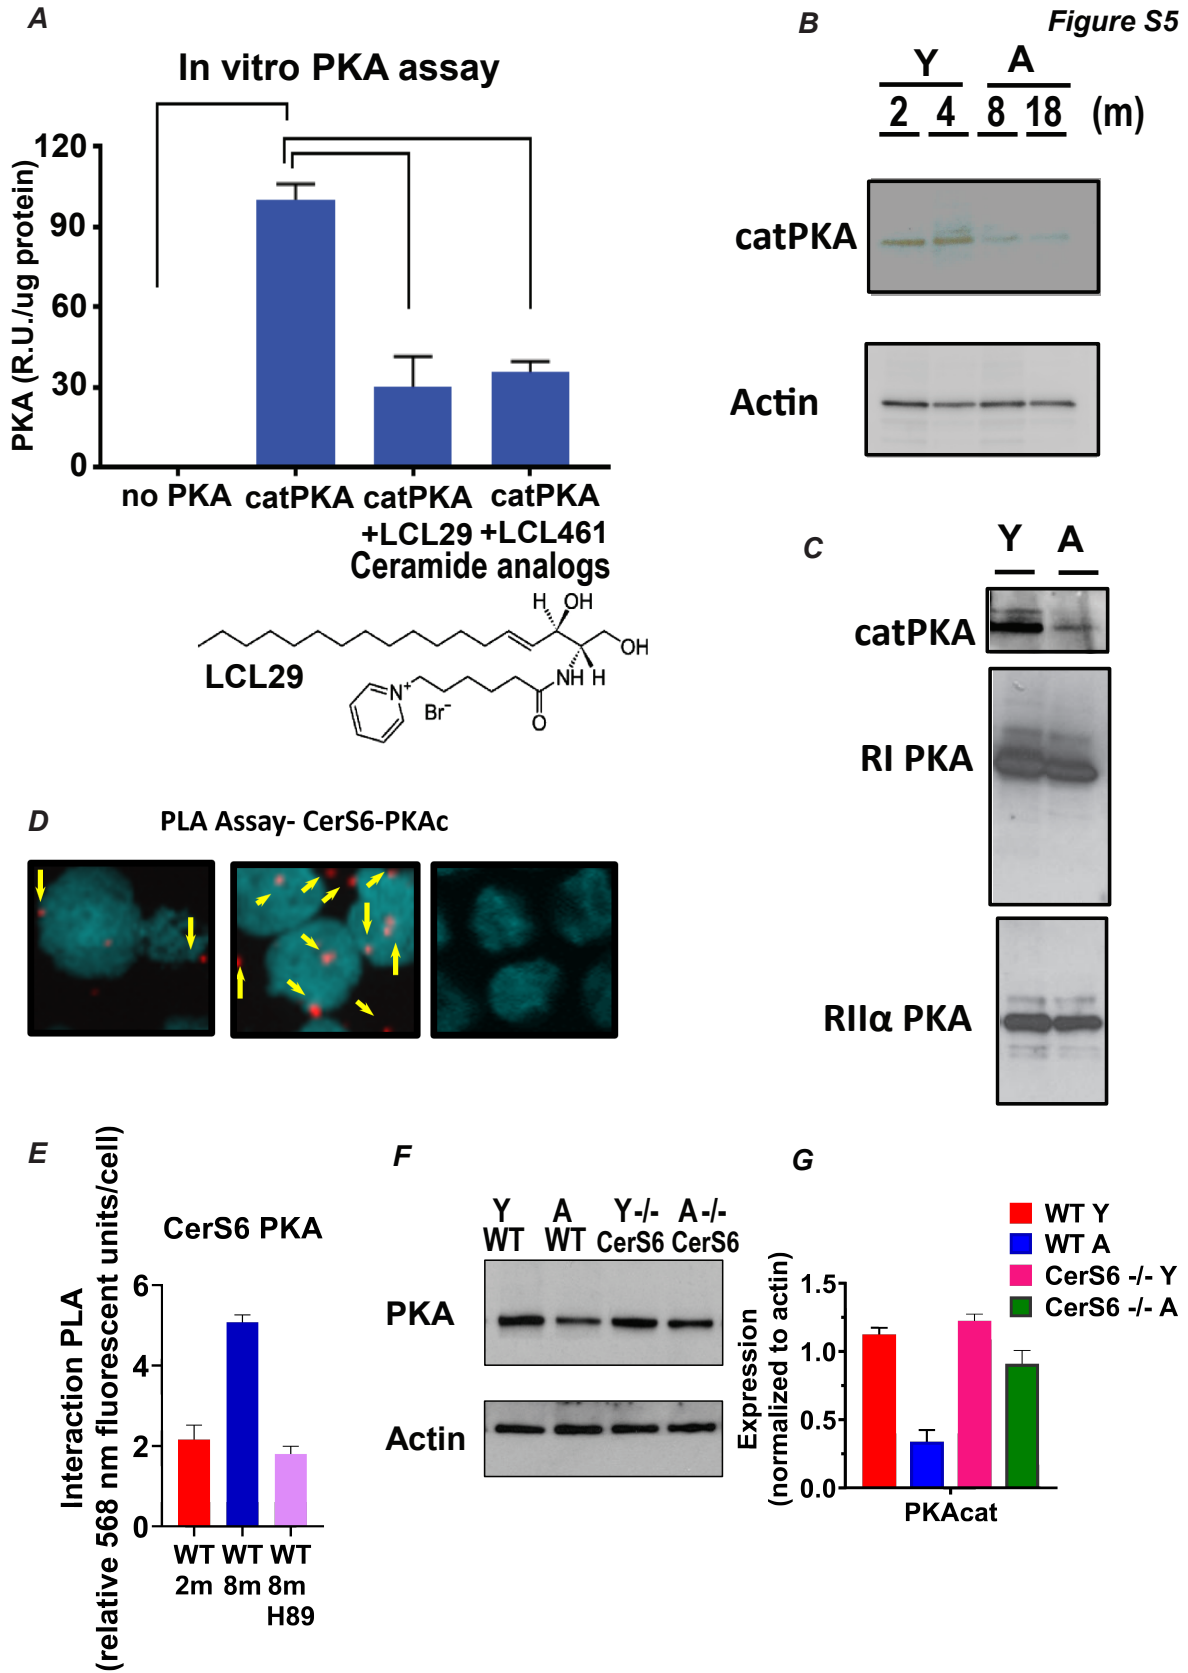

**Figure S5 (Related to Figures 5 and 6). Ceramide inhibits PKA in vitro and in T cells.** **A.** Effects of ceramide analogs, LCL-29 and LCL461, on PKA catalytic activity was measured in vitro using purified recombinant PKAc. **B.** Western blot measuring the abundance of PKAc protein in activated T cells from Y (2- 4 months old) and A (8-18-months old) mice. Actin was used as a loading control. **C.** Western blot measuring the levels of PKA regulatory I and II subunits (RI and RIIalpha PKA), along with catalytic PKA (catPKA) in activated T cells obtained from Y and A mice. **D-E.** Co-localization and association of CerS6 and PKAc in activated T cells isolated from Y and A mice in the absence/presence of H89 were measured by proximity ligation assay (PLA). Red signal shows close proximity of two proteins (<40 nm) in T cells (D). The quantification of PLA signals was performed as described by the manufacturer. These data represent three independent experiments (n=3). **F-G.** Western blot measuring the abundance of PKAc protein in activated T cells from Y (2- 4 months old) and A (8-18-months old) WT and CerS6<sup>-/-</sup> mice. Actin was used as a loading control (F). Quantification of the expression levels of PKAc normalized to actin is shown (G). These data represent three independent experiments (n=3). \**p*< 0.05 as determined by Student's *t*-test.

**Figure S6**

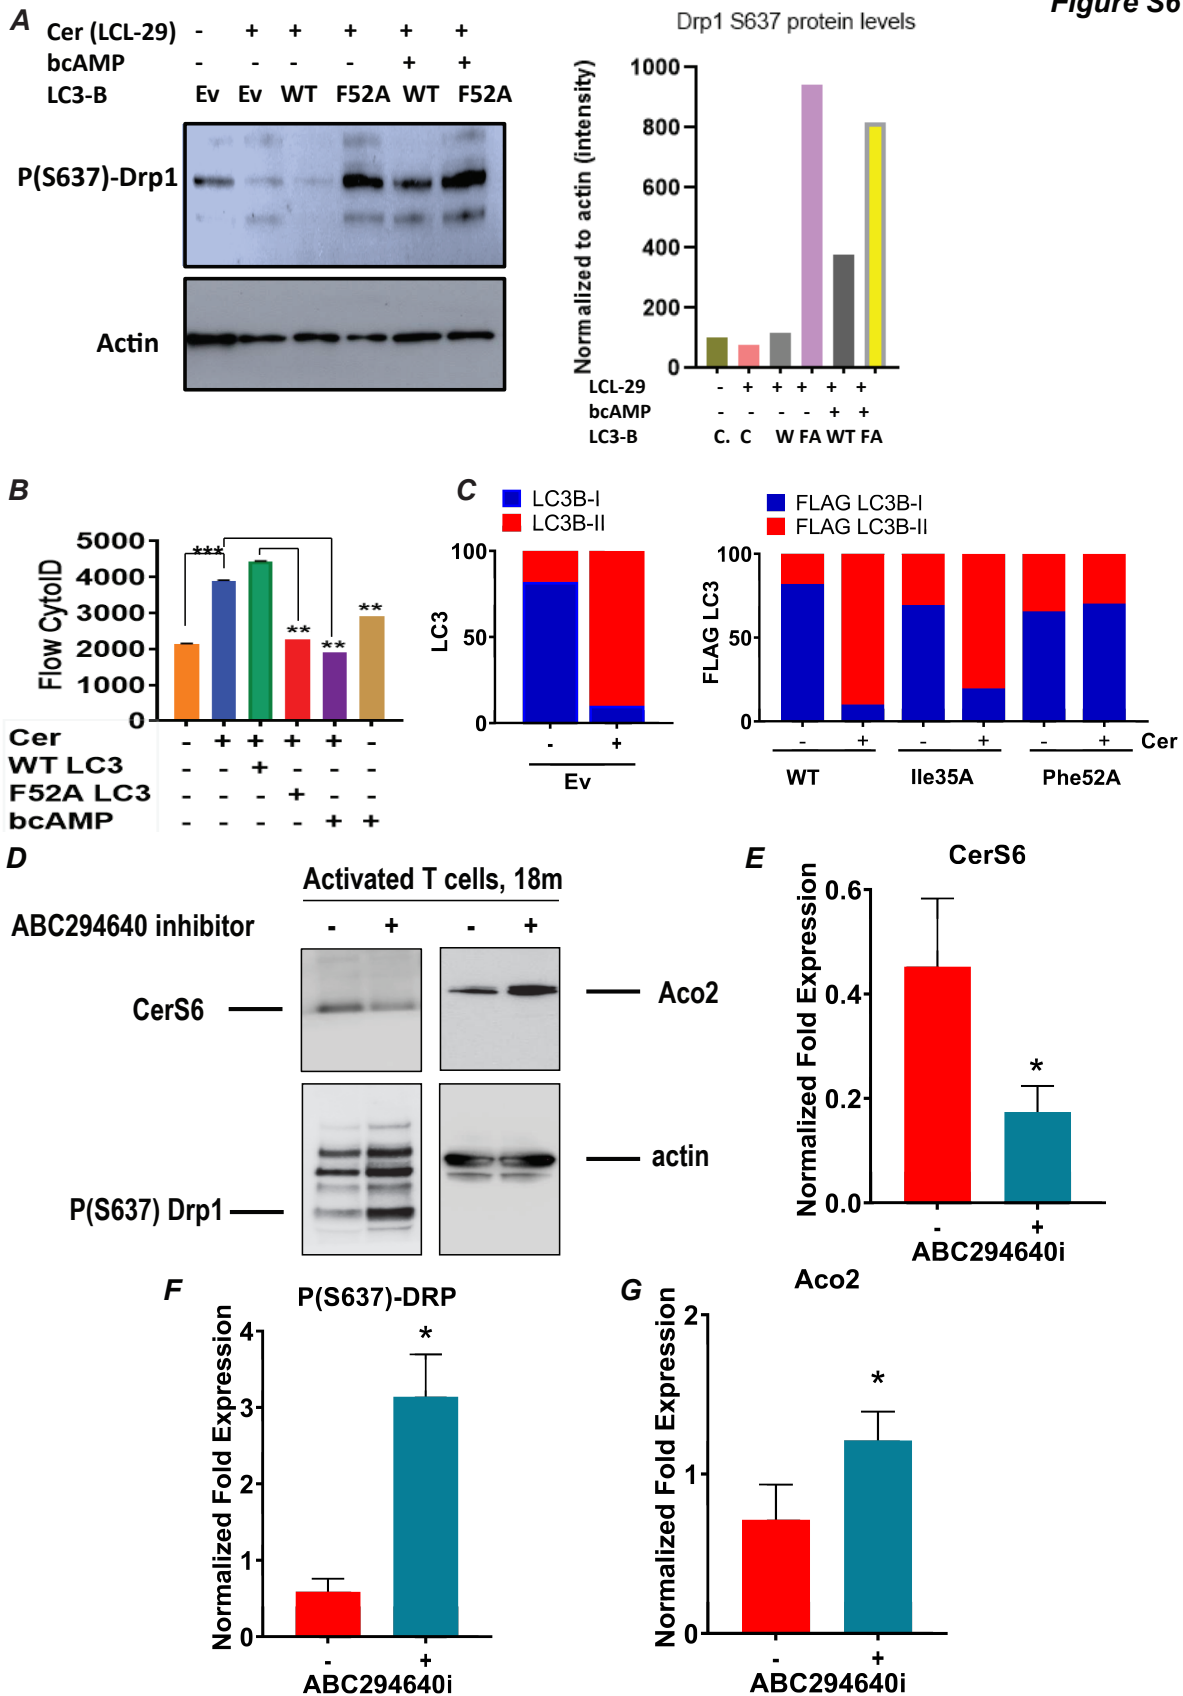

**Figure S6 (Related to Figure 6). LC3B-ceramide binding is required for ceramide-dependent T cell mitophagy.** **A.** Levels of P-(S637)-Drp1 in activated T cells isolated from WT Y mice were measured by Western blotting. Activated T cells were electroporated with WT-LC3B and LC3B-F52A mutant, or empty vector (EV). Effects of LCL-29 in the absence/presence of bcAMP on P-(S637)-Drp1 abundance were then measured by Western blotting. Actin was used as a loading control. Quantification of the expression levels of P-Drp1 on Western blots normalized to actin was shown on the right panel. **B-C.** Effects of ceramide analog LCL-29 (Cer) on LC3 activation were measured by flow cytometry (B) or Western blotting (C) in activated T cells transfected with EV, FLAG-LC3B-WT, -I35A, and -F52A in the absence/presence of bcAMP. Quantifications correspond to three independent experiments (n=3). **D-G.** Effects of SphK2 inhibitor ABC294640 on mitophagy were detected by Western blotting (D) in A T cells isolated from 18 months old WT mice to detect the levels of CerS6 (E), P-Drp1-S637 (F), and ACO2 (G) compared to age-matched vehicle treated controls, and actin was used as a loading control (D, lower panel). Quantifications correspond to three independent experiments (n=3).

**Figure S7**

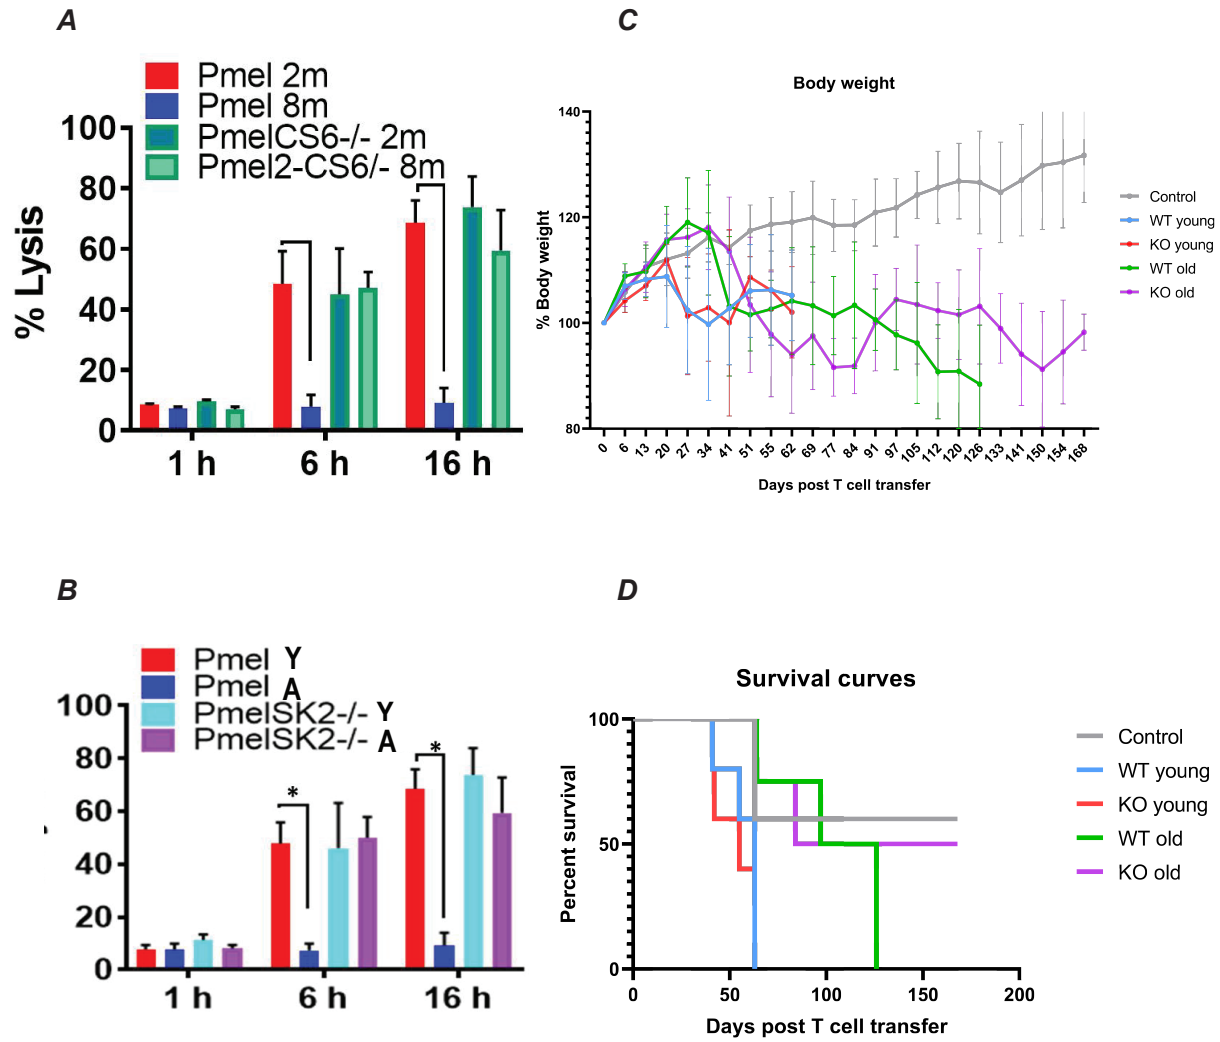

**Figure S7 (Related to Figure 7). Genetic loss of CerS6 or SphK2 improves anti-cancer functions of activated T cells in situ. A-B.** Effects of T cells isolated from young (Y) and aging (A) WT or CerS6<sup>-/-</sup> (CS6) (panel A) or SphK2<sup>-/-</sup> (SK2) (panel B) on B16 melanoma cell killing were measured in co-culture studies in situ at 1, 6 and 16 h. These data represent three independent experiments (n=3). \**p*< 0.05. **C-D.** Effects of CD4<sup>+</sup> naïve T cells isolated from WT and CerS6<sup>-/-</sup> (KO) A and Y mice on colitis induction was evaluated by body weight (C) and overall survival (D) measurements of Rag<sup>-/-</sup> recipient mice.

Data S1: Original blot images, related to Figures 1,2,4, and 6.

Fig 1H

F1 H  
top left p637

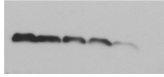

F1 H  
mid left p637

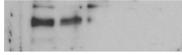

F1 H  
Bottom actin

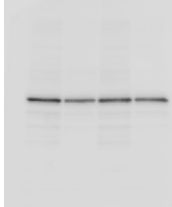

Fig 1I

F1 I  
top left aco2

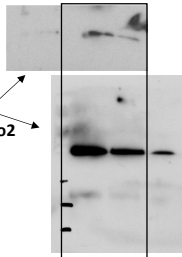

F1 I  
bottom left actin

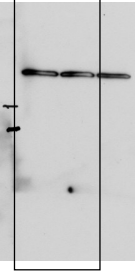

F1 I  
mid right p616

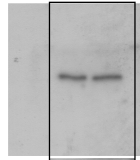

actin

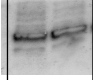

F1 I  
Total Drp

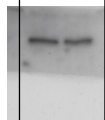

F1 I  
P637 Drp

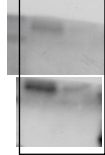

F1 I  
LC3

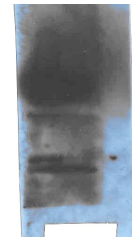

\*High Exposure

F1 I  
Total drp

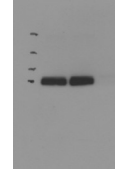



**Fig 2F**

F2 F  
Top P637drp

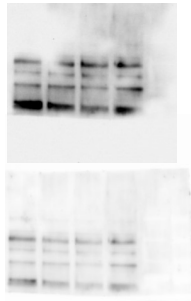

F2 F  
Bottom LC3

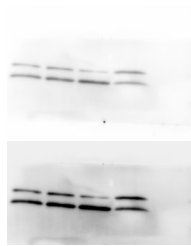

**Fig 2G**

F2 G  
top ACO2

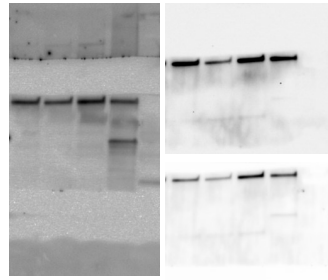

F2 G  
Actin

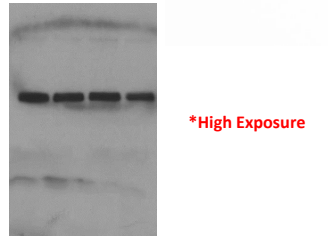

**Fig 4A**

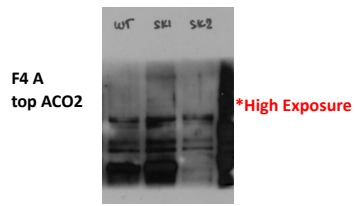

**Fig 4C**

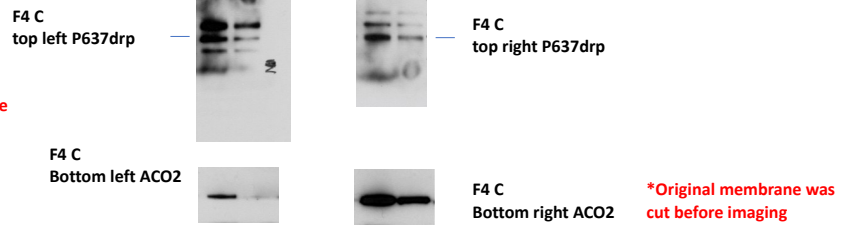

F4 C  
Bottom left ACO2

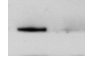

F4 C  
Bottom right ACO2

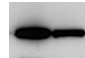

\*Original membrane was cut before imaging

**Fig 4E**

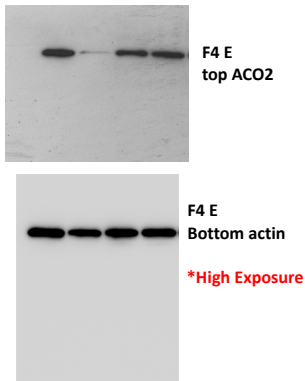

**Fig 6B**

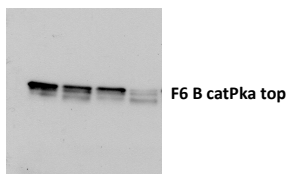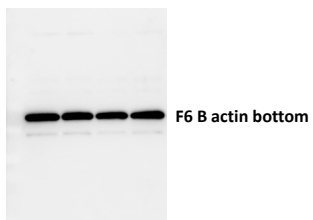

Supplement: NIHMS1700579-supplement-1.pdf [file NIHMS1700579-supplement-1.pdf]
